# Supplementary material for: Axial spondyloarthritis and axial psoriatic arthritis: similar or different disease spectrum?
Source: PubMed Central journal article supplement — Ther Adv Musculoskelet Dis. 2020 Nov 16;12:1759720X20971889. doi: 10.1177/1759720X20971889 (PMC7675867; doi:10.1177/1759720x20971889), 2020-11-16
Supplement: SUPPLEMENTARY_MATERIAL_14SEP2020.pdf [file SUPPLEMENTARY_MATERIAL_14SEP2020.pdf]

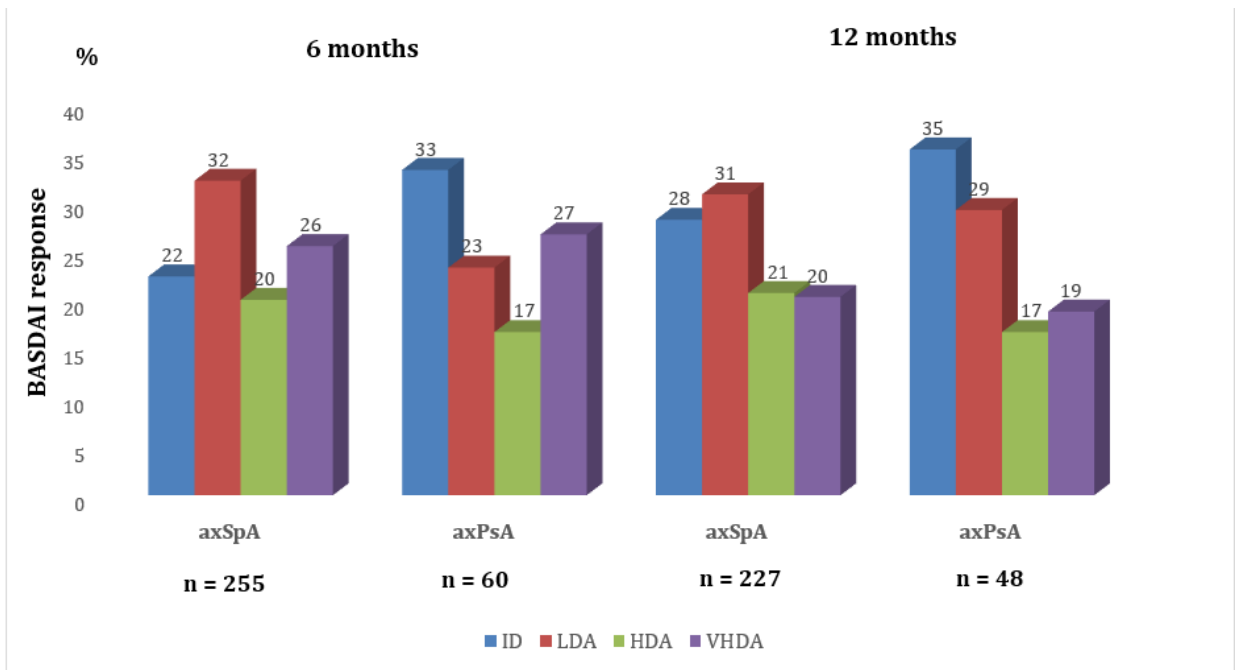

Figure S1. Clinical BASDAI response at 6 and 12 months in axSpA and axPsA. axSpA: axial spondyloarthritis; axPsA: axial psoriatic arthritis; ID: Inactive Disease; LDA: Low Disease Activity; HDA: High Disease Activity; VHDA: Very High Disease Activity.

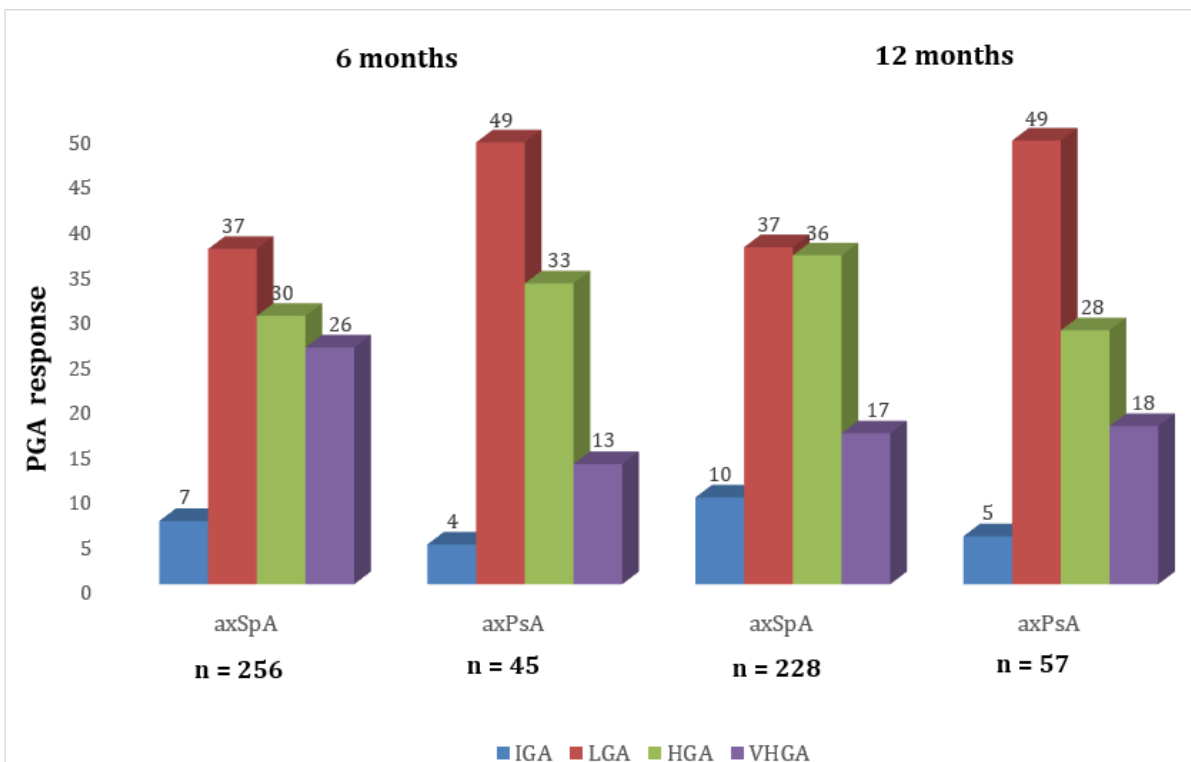

Figure S2. Clinical PtVAS response at 6 and 12 months in axSpA and axPsA. axSpA: axial spondyloarthritis; axPsA: axial psoriatic arthritis; IGA: Inactive Global Assessment; LGA: Low Global Assessment; HGA: High Global Assessment; VHGA: Very High Global Assessment.
